# Supplementary material for: Spatial diversity and distribution of fern and lycophyte species in karst and non-karst landscapes towards conservation needs
Source: Front Plant Sci. 2025 Mar 3;16:1495796. doi: 10.3389/fpls.2025.1495796 (PMC11912880; doi:10.3389/fpls.2025.1495796)
Supplement: Supplementary file 3 [file Supplementaryfile3.xlsx]

## Sheet: Sheet1
Supplementary File 3. Summary of the 27 abiotic variables considered in this study. They were classified in three main categories namely Physical/Chemical Parameters, Topography, and Bioclimatic variables. Each factor was given with a code, brief description, unit, and source. Factors printed in bold were found to be major contributors in the carried out analyses.
Category	Code	Description	Unit	Source
Physical/Chemical Variables	BDTICM	Absolute depth to bedrock	Cm	ISRIC
	CECSOIL	Cation Exchange Capacity of soil	Cmol/kg	ISRIC
	ORCDRC	Soil organic carbon content	Permille	ISRIC
	PHIHOX	pH index measured in water solution	pH	ISRIC
	SNDPPT	Weight percentage of the sand particles (0.05-2 mm)	Percentage	ISRIC
	CLYPPT	Weight percentage of the clay particles (<0.0002 mm)	Percentage	ISRIC
	SLTPPT	Weight percentage of the silt particles (0.0002-0.05 mm)	Percentage	ISRIC
Topographic	Elevation	Elevation	m.asl	ISRIC
Bioclimatic Variables	BIO 1	Annual Mean Temperature	°C * 10	WorldClim 2.1
	BIO 2	Mean Diurnal Range (Mean of monthly (max temp – min temp)	°C * 10	WorldClim 2.1
	BIO 3	Isothermality (BIO2/BIO7) (x100)	-	WorldClim 2.1
	BIO 4	Temperature Seasonality (standard deviation x 100)		WorldClim 2.1
	BIO 5	Max Temperature of Warmest Month	°C/month	WorldClim 2.1
	BIO 6	Min Temperature of Coldest Month	°C/month	WorldClim 2.1
	BIO 7	Temperature Annual Range (BIO5-BIO6)	°C	WorldClim 2.1
	BIO 8	Mean Temperature of Wettest Quarter	°C/quarter	WorldClim 2.1
	BIO 9	Mean Temperature of Driest Quarter	°C/quarter	WorldClim 2.1
	BIO 10	Mean Temperature of Warmest Quarter	°C/quarter	WorldClim 2.1
	BIO 11	Mean Temperature of Coldest Quarter	°C/quarter	WorldClim 2.1
	BIO 12	Annual Precipitation	mm/month	WorldClim 2.1
	BIO 13	Precipitation of Wettest Month	mm/month	WorldClim 2.1
	BIO 14	Precipitation of Driest Month	mm/month	WorldClim 2.1
	BIO 15	Precipitation Seasonality (Coefficient of Variation)	-	WorldClim 2.1
	BIO 16	Precipitation of Wettest Quarter	mm/quarter	WorldClim 2.1
	BIO 17	Precipitation of Driest Quarter	mm/quarter	WorldClim 2.1
	BIO 18	Precipitation of Warmest Quarter	mm/quarter	WorldClim 2.1
	BIO 19	Precipitation of Coldest Quarter	mm/quarter	WorldClim 2.1
